# Supplementary material for: Integrating Paleodistribution Models and Phylogeography in the Grass-Cutting Ant Acromyrmex striatus (Hymenoptera: Formicidae) in Southern Lowlands of South America
Source: PubMed Central journal article supplement (PMC4703384; doi:10.1371/journal.pone.0146734), 2016-01-06
Supplement: pone.0146734.s003.pdf [file pone.0146734.s003.pdf]

Table S1 - List of 311 new records of nests of *A. striatus* collected by us in Brazil and Argentina between February 2009 and August 2011.

| Locality             | Geographical coordinate |                |
|----------------------|-------------------------|----------------|
| Araranguá - SC       | S28° 57' 11.3"          | W49° 22' 29.6" |
| Araranguá - SC       | S28° 56' 36.4"          | W49° 27' 59.4" |
| Araranguá - SC       | S28° 57' 14.4"          | W49° 22' 33.0" |
| Araranguá - SC       | S28° 57' 15.1"          | W49° 22' 33.4" |
| Araranguá - SC       | S28° 57' 16.1"          | W49° 22' 34.3" |
| Araranguá - SC       | S28° 57' 18.1"          | W49° 22' 35.4" |
| Araranguá - SC       | S28° 57' 21.1"          | W49° 22' 38.6" |
| Araranguá - SC       | S28° 57' 07.7"          | W49° 22' 26.8" |
| Araranguá - SC       | S28° 57' 06.5"          | W49° 22' 26.4" |
| Araranguá - SC       | S28° 57' 06.9"          | W49° 22' 26.0" |
| Araranguá - SC       | S28° 57' 06.7"          | W49° 22' 28.3" |
| Araranguá - SC       | S28° 56' 12.3"          | W49° 21' 25.9" |
| Araranguá - SC       | S28° 56' 12.1"          | W49° 21' 23.5" |
| Araranguá - SC       | S28° 56' 10.5"          | W49° 21' 20.5" |
| Araranguá - SC       | S28° 56' 13.2"          | W49° 21' 21.2" |
| Araranguá - SC       | S28° 56' 03.9"          | W49° 21' 13.6" |
| Araranguá - SC       | S28° 56' 02.6"          | W49° 21' 12.5" |
| Araranguá - SC       | S28° 56' 02.0"          | W49° 21' 08.8" |
| Araranguá - SC       | S28° 55' 59.1"          | W49° 21' 06.3" |
| Arroio do Silva - SC | S29° 02' 53.2"          | W49° 28' 21.2" |
| Arroio do Silva - SC | S29° 02' 52.0"          | W49° 28' 20.1" |
| Arroio do Silva - SC | S29° 02' 50.1"          | W49° 28' 17.5" |
| Arroio do Silva - SC | S29° 02' 47.5"          | W49° 28' 16.6" |
| Arroio do Silva - SC | S29° 02' 43.1"          | W49° 28' 11.7" |
| Arroio do Silva - SC | S29° 02' 41.8"          | W49° 28' 10.8" |
| Arroio do Silva - SC | S29° 02' 39.7"          | W49° 28' 09.0" |
| Arroio do Silva - SC | S29° 02' 38.0"          | W49° 28' 09.6" |
| Arroio do Silva - SC | S29° 02' 38.8"          | W49° 28' 07.5" |
| Arroio do Silva - SC | S29° 02' 36.8"          | W49° 28' 09.0" |
| Arroio do Silva - SC | S29° 02' 36.1"          | W49° 28' 05.8" |
| Arroio do Silva - SC | S29° 00' 47.0"          | W49° 26' 21.4" |
| Arroio do Silva - SC | S29° 00' 47.6"          | W49° 26' 22.3" |
| Arroio do Silva - SC | S29° 00' 48.8"          | W49° 26' 20.0" |
| Arroio do Silva - SC | S29° 00' 50.0"          | W49° 26' 20.5" |
| Arroio do Silva - SC | S29° 00' 50.1"          | W49° 26' 22.3" |
| Arroio do Silva - SC | S29° 00' 50.9"          | W49° 26' 22.5" |
| Arroio do Silva - SC | S29° 00' 48.5"          | W49° 26' 24.3" |
| Arroio do Silva - SC | S29° 00' 49.9"          | W49° 26' 26.0" |
| Arroio do Silva - SC | S29° 00' 54.1"          | W49° 26' 24.5" |
| Arroio do Silva - SC | S29° 00' 59.2"          | W49° 26' 27.6" |
| Arroio do Silva - SC | S29° 00' 59.3"          | W49° 26' 30.6" |

|                |                |                |
|----------------|----------------|----------------|
| Gaivota - SC   | S29° 11' 03.5" | W49° 35' 57.7" |
| Gaivota - SC   | S29° 11' 05.4" | W49° 35' 58.0" |
| Gaivota - SC   | S29° 11' 05.5" | W49° 35' 58.3" |
| Gaivota - SC   | S29° 11' 05.9" | W49° 35' 58.5" |
| Gaivota - SC   | S29° 11' 05.4" | W49° 35' 59.4" |
| Gaivota - SC   | S29° 11' 06.6" | W49° 35' 58.6" |
| Gaivota - SC   | S29° 11' 07.4" | W49° 35' 59.4" |
| Gaivota - SC   | S29° 11' 08.9" | W49° 36' 00.9" |
| Gaivota - SC   | S29° 11' 10.6" | W49° 36' 02.0" |
| Gaivota - SC   | S29° 11' 08.3" | W49° 36' 02.3" |
| Gaivota - SC   | S29° 11' 00.7" | W49° 35' 54.6" |
| Laguna - SC    | S28° 36' 30.4" | W48° 50' 09.4" |
| Laguna - SC    | S28° 36' 30.5" | W48° 50' 07.7" |
| Laguna - SC    | S28° 36' 28.5" | W48° 50' 07.1" |
| Laguna - SC    | S28° 36' 28.8" | W48° 50' 06.8" |
| Laguna - SC    | S28° 36' 28.2" | W48° 50' 05.8" |
| Laguna - SC    | S28° 36' 27.4" | W48° 50' 04.2" |
| Laguna - SC    | S28° 36' 27.2" | W48° 50' 03.2" |
| Laguna - SC    | S28° 36' 26.1" | W48° 50' 02.4" |
| Laguna - SC    | S28° 36' 25.5" | W48° 50' 03.0" |
| Laguna - SC    | S28° 36' 24.4" | W48° 50' 00.3" |
| Ilhas - SC     | S28° 54' 40.8" | W49° 21' 36.8" |
| Ilhas - SC     | S28° 54' 38.3" | W49° 21' 50.8" |
| Ilhas - SC     | S28° 54' 38.4" | W49° 21' 51.3" |
| Ilhas - SC     | S28° 54' 12.2" | W49° 19' 13.9" |
| Ilhas - SC     | S28° 54' 11.2" | W49° 19' 13.3" |
| Ilhas - SC     | S28° 54' 09.4" | W49° 19' 10.0" |
| Ilhas - SC     | S28° 54' 14.5" | W49° 19' 20.2" |
| Ilhas - SC     | S28° 54' 14.2" | W49° 19' 19.2" |
| Ilhas - SC     | S28° 54' 13.6" | W49° 19' 17.6" |
| Ilhas - SC     | S28° 54' 12.1" | W49° 19' 14.0" |
| Ilhas - SC     | S28° 54' 10.7" | W49° 19' 12.9" |
| Ilhas - SC     | S28° 54' 09.5" | W49° 19' 10.6" |
| Ilhas - SC     | S28° 54' 08.1" | W49° 19' 09.4" |
| Rincão - SC    | S28° 48' 55.9" | W49° 12' 24.3" |
| Rincão - SC    | S28° 48' 54.8" | W49° 12' 22.7" |
| Rincão - SC    | S28° 48' 53.3" | W49° 12' 17.4" |
| Rincão - SC    | S28° 48' 50.0" | W49° 12' 15.1" |
| Rincão - SC    | S28° 48' 47.4" | W49° 12' 13.0" |
| Rincão - SC    | S28° 48' 47.0" | W49° 12' 09.0" |
| Rincão - SC    | S28° 48' 45.4" | W49° 12' 06.1" |
| Rincão - SC    | S28° 48' 43.1" | W49° 12' 05.3" |
| Rincão - SC    | S28° 48' 41.4" | W49° 12' 04.5" |
| Rincão - SC    | S28° 48' 38.0" | W49° 12' 00.9" |
| Itapirubá - SC | S28° 19' 10.4" | W48° 42' 31.4" |
| Itapirubá - SC | S28° 19' 02.6" | W48° 42' 29.7" |

|                 |                |                |
|-----------------|----------------|----------------|
| Itapirubá - SC  | S28° 18' 56.5" | W48° 42' 28.1" |
| Itapirubá - SC  | S28° 18' 52.9" | W48° 42' 25.6" |
| Itapirubá - SC  | S28° 18' 47.9" | W48° 42' 23.9" |
| Itapirubá - SC  | S28° 18' 46.0" | W48° 42' 23.3" |
| Itapirubá - SC  | S28° 18' 42.5" | W48° 42' 22.3" |
| Itapirubá - SC  | S28° 18' 39.3" | W48° 42' 20.4" |
| Itapirubá - SC  | S28° 18' 36.2" | W48° 42' 20.2" |
| Itapirubá - SC  | S28° 18' 30.4" | W48° 42' 18.3" |
| Garopaba - SC   | S27° 59' 42.4" | W48° 37' 55.5" |
| Garopaba - SC   | S27° 59' 41.3" | W48° 37' 55.1" |
| Garopaba - SC   | S27° 59' 40.0" | W48° 37' 55.3" |
| Garopaba - SC   | S27° 59' 36.9" | W48° 37' 54.7" |
| Garopaba - SC   | S27° 59' 34.3" | W48° 37' 54.6" |
| Garopaba - SC   | S27° 59' 29.1" | W48° 37' 53.8" |
| Garopaba - SC   | S27° 59' 15.0" | W48° 37' 53.5" |
| Garopaba - SC   | S27° 59' 18.6" | W48° 37' 54.8" |
| Garopaba - SC   | S27° 59' 13.7" | W48° 37' 49.8" |
| Garopaba - SC   | S27° 59' 08.5" | W48° 37' 48.6" |
| Ibiraquera - SC | S28° 09' 47.3" | W48° 39' 22.7" |
| Ibiraquera - SC | S28° 09' 48.0" | W48° 39' 23.1" |
| Ibiraquera - SC | S28° 09' 50.0" | W48° 39' 24.5" |
| Ibiraquera - SC | S28° 09' 50.9" | W48° 39' 25.3" |
| Ibiraquera - SC | S28° 09' 53.6" | W48° 39' 25.7" |
| Ibiraquera - SC | S28° 09' 55.1" | W48° 39' 26.7" |
| Ibiraquera - SC | S28° 09' 57.0" | W48° 39' 27.6" |
| Ibiraquera - SC | S28° 09' 59.6" | W48° 39' 29.0" |
| Ibiraquera - SC | S28° 10' 00.5" | W48° 39' 29.1" |
| Ibiraquera - SC | S28° 10' 02.4" | W48° 39' 30.2" |
| Pinheira - SC   | S27° 52' 31.3" | W48° 36' 02.4" |
| Pinheira - SC   | S27° 52' 27.2" | W48° 36' 03.4" |
| Pinheira - SC   | S27° 52' 24.1" | W48° 36' 05.4" |
| Pinheira - SC   | S27° 52' 21.0" | W48° 36' 07.6" |
| Pinheira - SC   | S27° 52' 15.5" | W48° 36' 08.6" |
| Sonho - SC      | S27° 50' 32.1" | W48° 35' 14.8" |
| Sonho - SC      | S27° 50' 25.6" | W48° 35' 15.3" |
| Sonho - SC      | S27° 50' 24.0" | W48° 35' 15.6" |
| Sonho - SC      | S27° 50' 21.7" | W48° 35' 14.7" |
| Sonho - SC      | S27° 50' 19.9" | W48° 35' 15.8" |
| Moçambique - SC | S27° 29' 14.4" | W48° 23' 28.8" |
| Moçambique - SC | S27° 29' 10.9" | W48° 23' 25.2" |
| Moçambique - SC | S27° 29' 09.7" | W48° 23' 22.6" |
| Moçambique - SC | S27° 29' 02.0" | W48° 23' 10.3" |
| Moçambique - SC | S27° 28' 55.6" | W48° 23' 08.5" |
| Moçambique - SC | S27° 28' 55.7" | W48° 23' 14.7" |
| Joaquina - SC   | S27° 37' 31.1" | W48° 27' 01.7" |
| Joaquina - SC   | S27° 37' 35.5" | W48° 26' 59.7" |

|                     |                |                |
|---------------------|----------------|----------------|
| Joaquina - SC       | S27° 37' 41.0" | W48° 26' 59.0" |
| Joaquina - SC       | S27° 37' 45.2" | W48° 27' 03.4" |
| Joaquina - SC       | S27° 37' 50.2" | W48° 27' 06.7" |
| Joaquina - SC       | S27° 37' 53.0" | W48° 27' 08.1" |
| Joaquina - SC       | S27° 37' 56.1" | W48° 27' 11.1" |
| Joaquina - SC       | S27° 38' 01.1" | W48° 27' 18.3" |
| Joaquina - SC       | S27° 38' 05.2" | W48° 27' 19.9" |
| Joaquina - SC       | S27° 38' 10.3" | W48° 27' 23.9" |
| Pantano do Sul - SC | S27° 46' 52.9" | W48° 31' 12.8" |
| Pantano do Sul - SC | S27° 46' 51.7" | W48° 31' 09.1" |
| Pantano do Sul - SC | S27° 46' 49.2" | W48° 31' 03.6" |
| Pantano do Sul - SC | S27° 46' 49.5" | W48° 31' 01.5" |
| Pantano do Sul - SC | S27° 46' 48.3" | W48° 30' 56.3" |
| Torres - RS         | S29° 21' 47.9" | W49° 44' 27.4" |
| Torres - RS         | S29° 21' 51.8" | W49° 44' 31.7" |
| Torres - RS         | S29° 22' 01.2" | W49° 44' 41.5" |
| Torres - RS         | S29° 22' 00.3" | W49° 44' 43.1" |
| Torres - RS         | S29° 21' 59.6" | W49° 44' 45.6" |
| Torres - RS         | S29° 21' 58.3" | W49° 44' 48.9" |
| Torres - RS         | S29° 21' 58.3" | W49° 44' 51.8" |
| Torres - RS         | S29° 21' 59.1" | W49° 44' 55.3" |
| Torres - RS         | S29° 21' 57.3" | W49° 45' 01.0" |
| Torres - RS         | S29° 22' 02.8" | W49° 45' 01.9" |
| Curumin - RS        | S29° 37' 11.7" | W49° 55' 54.7" |
| Curumin - RS        | S29° 37' 09.0" | W49° 55' 52.7" |
| Curumin - RS        | S29° 37' 04.4" | W49° 55' 50.3" |
| Curumin - RS        | S29° 37' 00.8" | W49° 55' 49.8" |
| Curumin - RS        | S29° 36' 59.5" | W49° 55' 50.7" |
| Curumin - RS        | S29° 36' 58.5" | W49° 55' 49.1" |
| Curumin - RS        | S29° 36' 58.2" | W49° 55' 45.9" |
| Curumin - RS        | S29° 36' 53.9" | W49° 55' 43.8" |
| Curumin - RS        | S29° 36' 51.3" | W49° 55' 41.6" |
| Curumin - RS        | S29° 37' 18.1" | W49° 55' 59.5" |
| Xangrilá - RS       | S29° 49' 02.3" | W50° 02' 33.9" |
| Xangrilá - RS       | S29° 48' 59.8" | W50° 02' 33.1" |
| Xangrilá - RS       | S29° 48' 58.0" | W50° 02' 32.9" |
| Xangrilá - RS       | S29° 49' 21.9" | W50° 02' 45.3" |
| Xangrilá - RS       | S29° 49' 23.3" | W50° 02' 45.9" |
| Cidreira - RS       | S30° 08' 08.7" | W50° 11' 13.3" |
| Cidreira - RS       | S30° 07' 58.1" | W50° 11' 10.8" |
| Cidreira - RS       | S30° 07' 55.6" | W50° 11' 12.0" |
| Cidreira - RS       | S30° 07' 49.1" | W50° 11' 08.0" |
| Quintão - RS        | S30° 23' 41.4" | W50° 18' 01.8" |
| Quintão - RS        | S30° 23' 39.2" | W50° 18' 01.1" |
| Quintão - RS        | S30° 23' 34.9" | W50° 17' 57.3" |
| Quintão - RS        | S30° 23' 48.2" | W50° 18' 03.8" |

|                        |                |                |
|------------------------|----------------|----------------|
| Quintão - RS           | S30° 23' 47.5" | W50° 18' 08.8" |
| Quintão - RS           | S30° 23' 47.0" | W50° 18' 13.0" |
| Quintão - RS           | S30° 23' 43.4" | W50° 18' 15.0" |
| Mostardas - RS         | S31° 07' 43.4" | W50° 49' 57.2" |
| Mostardas - RS         | S31° 07' 47.9" | W50° 49' 54.3" |
| Mostardas - RS         | S31° 07' 48.2" | W50° 49' 55.8" |
| Mostardas - RS         | S31° 06' 37.2" | W50° 52' 13.4" |
| Mostardas - RS         | S31° 06' 37.2" | W50° 52' 12.4" |
| Mostardas - RS         | S31° 06' 33.8" | W50° 52' 36.4" |
| Mostardas - RS         | S31° 06' 32.1" | W50° 52' 47.4" |
| Mostardas - RS         | S31° 06' 30.3" | W50° 52' 58.4" |
| Mostardas - RS         | S31° 06' 22.6" | W50° 53' 47.9" |
| São Simão - RS         | S30° 58' 51.2" | W50° 48' 22.2" |
| São Simão - RS         | S30° 56' 04.4" | W50° 45' 43.8" |
| Tavares - RS           | S31° 19' 12.7" | W51° 06' 54.0" |
| Tavares - RS           | S31° 19' 11.3" | W51° 06' 55.8" |
| Tavares - RS           | S31° 19' 16.7" | W51° 06' 53.6" |
| Tavares - RS           | S31° 19' 18.2" | W51° 06' 48.3" |
| Tavares - RS           | S31° 19' 17.1" | W51° 06' 46.7" |
| Tavares - RS           | S31° 19' 16.5" | W51° 06' 44.0" |
| Tavares - RS           | S31° 19' 15.7" | W51° 06' 41.7" |
| Tavares - RS           | S31° 19' 16.6" | W51° 06' 40.1" |
| Tavares - RS           | S31° 19' 19.9" | W51° 06' 46.2" |
| Tavares - RS           | S31° 19' 20.8" | W51° 06' 51.4" |
| São José do Norte - RS | S32° 01' 39.8" | W52° 01' 56.3" |
| São José do Norte - RS | S32° 01' 39.8" | W52° 01' 55.3" |
| São José do Norte - RS | S32° 01' 37.7" | W52° 01' 53.6" |
| São José do Norte - RS | S32° 01' 38.9" | W52° 01' 51.2" |
| São José do Norte - RS | S32° 01' 33.9" | W52° 01' 57.6" |
| São José do Norte - RS | S32° 01' 37.6" | W52° 01' 57.7" |
| São José do Norte - RS | S32° 01' 37.2" | W52° 01' 59.0" |
| São José do Norte - RS | S32° 01' 37.7" | W52° 02' 01.5" |
| São José do Norte - RS | S32° 01' 39.2" | W52° 02' 05.0" |
| São José do Norte - RS | S32° 01' 41.9" | W52° 02' 07.3" |
| Estreio - RS           | S31° 51' 11.0" | W51° 47' 25.1" |
| Estreio - RS           | S31° 51' 08.9" | W51° 47' 26.1" |
| Estreio - RS           | S31° 51' 08.1" | W51° 47' 27.2" |
| Estreio - RS           | S31° 51' 06.0" | W51° 47' 27.0" |
| Estreio - RS           | S31° 51' 04.1" | W51° 47' 30.8" |
| Cassino - RS           | S32° 13' 19.8" | W52° 12' 03.4" |
| Cassino - RS           | S32° 06' 57.3" | W52° 10' 25.0" |
| Cassino - RS           | S32° 06' 57.7" | W52° 10' 24.0" |
| Cassino - RS           | S32° 06' 57.2" | W52° 10' 23.3" |
| Cassino - RS           | S32° 06' 55.8" | W52° 10' 22.5" |
| Cassino - RS           | S32° 06' 55.3" | W52° 10' 21.9" |
| Cassino - RS           | S32° 06' 52.1" | W52° 10' 18.3" |

|                       |                |                |
|-----------------------|----------------|----------------|
| Cassino - RS          | S32° 06' 52.6" | W52° 10' 16.8" |
| Cassino - RS          | S32° 06' 51.8" | W52° 10' 14.9" |
| Cassino - RS          | S32° 06' 50.0" | W52° 10' 13.9" |
| Santa Maria - RS      | S29° 39' 11.7" | W54° 03' 15.6" |
| Santa Maria - RS      | S29° 39' 11.7" | W54° 03' 14.9" |
| Santa Maria - RS      | S29° 39' 10.5" | W54° 03' 14.9" |
| Santa Maria - RS      | S29° 39' 05.9" | W54° 03' 14.8" |
| Santa Maria - RS      | S29° 39' 04.9" | W54° 03' 13.9" |
| Santa Maria - RS      | S29° 39' 05.1" | W54° 03' 16.7" |
| Santa Maria - RS      | S29° 39' 05.9" | W54° 03' 16.7" |
| Santa Maria - RS      | S29° 39' 07.3" | W54° 03' 16.3" |
| Santa Maria - RS      | S29° 39' 06.9" | W54° 03' 15.2" |
| Santa Maria - RS      | S29° 39' 08.2" | W54° 03' 14.9" |
| Restinga Seca - RS    | S29° 45' 58.4" | W53° 29' 26.3" |
| Restinga Seca - RS    | S29° 46' 01.2" | W53° 29' 36.9" |
| Restinga Seca - RS    | S29° 46' 02.3" | W53° 29' 39.5" |
| Restinga Seca - RS    | S29° 46' 02.7" | W53° 29' 40.8" |
| Restinga Seca - RS    | S29° 46' 03.1" | W53° 29' 38.7" |
| Santiago - RS         | S29° 10' 48.4" | W54° 50' 59.3" |
| Santiago - RS         | S29° 10' 49.3" | W54° 51' 00.4" |
| Santiago - RS         | S29° 10' 50.5" | W54° 50' 57.9" |
| Santiago - RS         | S29° 10' 50.3" | W54° 50' 56.3" |
| Santiago - RS         | S29° 10' 49.7" | W54° 50' 57.7" |
| Unistalda - RS        | S29° 02' 22.6" | W55° 12' 52.1" |
| Unistalda - RS        | S29° 02' 22.7" | W55° 12' 52.1" |
| Unistalda - RS        | S29° 02' 22.6" | W55° 12' 49.6" |
| Unistalda - RS        | S29° 02' 22.9" | W55° 12' 50.2" |
| Unistalda - RS        | S29° 02' 22.7" | W55° 12' 51.0" |
| Cruz Alta – RS        | S28° 57' 11.8" | W53° 38' 49.4" |
| Cruz Alta – RS        | S28° 57' 11.1" | W53° 38' 50.0" |
| Cruz Alta – RS        | S28° 57' 09.1" | W53° 38' 50.3" |
| Cruz Alta – RS        | S28° 57' 08.2" | W53° 38' 50.6" |
| Cruz Alta – RS        | S28° 57' 07.1" | W53° 38' 50.7" |
| Cachoeira do Sul - RS | S29° 50' 26.1" | W52° 57' 57.7" |
| Cachoeira do Sul - RS | S29° 50' 26.9" | W52° 57' 57.2" |
| Cachoeira do Sul - RS | S29° 50' 27.8" | W52° 57' 59.2" |
| Cachoeira do Sul - RS | S29° 50' 27.5" | W52° 58' 01.8" |
| Cachoeira do Sul - RS | S29° 50' 27.0" | W52° 58' 02.9" |
| Cachoeira do Sul - RS | S29° 50' 27.4" | W52° 58' 04.5" |
| Cachoeira do Sul - RS | S29° 50' 26.1" | W52° 58' 03.0" |
| Cachoeira do Sul - RS | S29° 50' 25.1" | W52° 58' 02.3" |
| Caçapava do Sul - RS  | S30° 36' 44.7" | W53° 21' 35.2" |
| Caçapava do Sul - RS  | S30° 36' 44.2" | W53° 21' 36.1" |
| Caçapava do Sul - RS  | S30° 36' 45.2" | W53° 21' 37.6" |
| Caçapava do Sul - RS  | S30° 36' 45.8" | W53° 21' 38.1" |
| Caçapava do Sul - RS  | S30° 36' 43.8" | W53° 21' 36.5" |

|                                   |                |                |
|-----------------------------------|----------------|----------------|
| Pedro Osório - RS                 | S32° 01' 07.1" | W52° 49' 48.9" |
| Pedro Osório - RS                 | S32° 01' 06.5" | W52° 49' 47.7" |
| Pedro Osório - RS                 | S32° 01' 05.2" | W52° 49' 46.1" |
| Pedro Osório - RS                 | S32° 00' 29.7" | W52° 49' 18.1" |
| Bagé - RS                         | S31° 22' 05.9" | W54° 07' 03.0" |
| Bagé - RS                         | S31° 22' 05.2" | W54° 07' 04.6" |
| Bagé - RS                         | S31° 22' 05.0" | W54° 07' 05.4" |
| Bagé - RS                         | S31° 22' 04.7" | W54° 07' 06.0" |
| Bagé - RS                         | S31° 22' 06.2" | W54° 07' 02.2" |
| Bagé - RS                         | S31° 22' 05.4" | W54° 06' 58.1" |
| Bagé - RS                         | S31° 22' 05.9" | W54° 06' 51.2" |
| Tapes - RS                        | S30° 39' 08.6" | W51° 33' 54.1" |
| Tapes - RS                        | S30° 39' 08.5" | W51° 33' 57.9" |
| Tapes - RS                        | S30° 39' 09.4" | W51° 33' 56.1" |
| Tapes - RS                        | S30° 39' 10.2" | W51° 33' 53.5" |
| Tapes - RS                        | S30° 39' 09.3" | W51° 33' 50.5" |
| Santa Rosa - Argentina            | S36° 37' 07.1" | W64° 19' 42.8" |
| Santa Rosa - Argentina            | S36° 37' 06.8" | W64° 19' 42.9" |
| Santa Rosa - Argentina            | S36° 37' 06.7" | W64° 19' 43.5" |
| Santa Rosa - Argentina            | S36° 37' 06.5" | W64° 19' 42.4" |
| Santa Rosa - Argentina            | S36° 37' 05.8" | W64° 19' 42.6" |
| Ataliba Roca - Argentina          | S37° 03' 00.9" | W64° 17' 05.3" |
| Ataliba Roca - Argentina          | S37° 03' 00.2" | W64° 17' 04.9" |
| Ataliba Roca - Argentina          | S37° 03' 00.1" | W64° 17' 05.3" |
| Ataliba Roca - Argentina          | S37° 02' 59.7" | W64° 17' 05.2" |
| Ataliba Roca - Argentina          | S37° 03' 00.6" | W64° 17' 05.9" |
| Ataliba Roca - Argentina          | S37° 03' 00.0" | W64° 17' 06.0" |
| Entre Lihue Calel - Argentina     | S37° 32' 03.4" | W65° 09' 20.1" |
| Entre Lihue Calel - Argentina     | S37° 32' 04.7" | W65° 09' 21.2" |
| Entre Lihue Calel - Argentina     | S37° 32' 01.7" | W65° 09' 18.0" |
| Entre Lihue Calel - Argentina     | S37° 32' 01.6" | W65° 09' 17.9" |
| Entre Lihue Calel - Argentina     | S37° 32' 01.0" | W65° 09' 19.4" |
| Parque Lihue Calel -<br>Argentina | S37° 52' 56.5" | W65° 27' 56.0" |
| Parque Lihue Calel -<br>Argentina | S37° 52' 57.6" | W65° 27' 57.0" |
| Parque Lihue Calel -<br>Argentina | S37° 52' 59.0" | W65° 27' 58.2" |
| Parque Lihue Calel -<br>Argentina | S37° 52' 54.9" | W65° 27' 54.5" |
| Winifreda - Argentina             | S36° 12' 34.4" | W64° 16' 39.3" |
| Winifreda - Argentina             | S36° 12' 34.9" | W64° 16' 39.4" |
| Winifreda - Argentina             | S36° 12' 34.6" | W64° 16' 39.9" |
| Winifreda - Argentina             | S35° 13' 31.4" | W64° 15' 54.2" |

---

SC: Santa Catarina State; RS: Rio Grande do Sul State.
