# Supplementary material for: Integrating Paleodistribution Models and Phylogeography in the Grass-Cutting Ant Acromyrmex striatus (Hymenoptera: Formicidae) in Southern Lowlands of South America
Source: PubMed Central journal article supplement (PMC4703384; doi:10.1371/journal.pone.0146734), 2016-01-06
Supplement: pone.0146734.s004.pdf [file pone.0146734.s004.pdf]

**Table S2** - Analysis of molecular variance (AMOVA) for the *A. striatus*, performed with three hierarchical levels, considering each 38 sites in Brazil e Argentina (populations), considering the groups formed by SAMOVA (7 groups).

| <b>Source of variation</b>      | <b>d.f.</b> | <b>Percentage of variation</b> |
|---------------------------------|-------------|--------------------------------|
| Among groups                    | 6           | 79.46                          |
| Among populations within groups | 31          | 7.73                           |
| Within groups                   | 90          | 12.82                          |
