# Supplementary material for: Integrating Paleodistribution Models and Phylogeography in the Grass-Cutting Ant Acromyrmex striatus (Hymenoptera: Formicidae) in Southern Lowlands of South America
Source: PubMed Central journal article supplement (PMC4703384; doi:10.1371/journal.pone.0146734), 2016-01-06
Supplement: pone.0146734.s005.pdf [file pone.0146734.s005.pdf]

**Table S3** –  $F_{ST}$  values of pair-wise comparisons between populations of *Acromyrmex striatus*, estimated from the mitochondrial COI gene.

Values shown in bold are significant ( $p < 0.05$ ).

|      | FLOR          | CONT          | CABO          | LAGU          | SOUT          | EXTR          | NORT          | MOTD          | RIOG          | INTE          | SAMA          | WEST          | ARGE  |
|------|---------------|---------------|---------------|---------------|---------------|---------------|---------------|---------------|---------------|---------------|---------------|---------------|-------|
| FLOR | 0.0000        |               |               |               |               |               |               |               |               |               |               |               |       |
| CONT | 0.2871        | 0.0000        |               |               |               |               |               |               |               |               |               |               |       |
| CABO | 0.1140        | 0.0903        | 0.0000        |               |               |               |               |               |               |               |               |               |       |
| LAGU | 0.0000        | 0.0222        | 0.0134        | 0.0000        |               |               |               |               |               |               |               |               |       |
| SOUT | 0.0318        | 0.0418        | -0.0112       | -0.0251       | 0.0000        |               |               |               |               |               |               |               |       |
| EXTR | 0.0811        | 0.0387        | 0.1030        | 0.0165        | 0.0192        | 0.0000        |               |               |               |               |               |               |       |
| NORT | <b>0.5808</b> | <b>0.5145</b> | <b>0.5160</b> | <b>0.5369</b> | <b>0.5370</b> | <b>0.5652</b> | 0.0000        |               |               |               |               |               |       |
| MOTD | <b>0.9023</b> | <b>0.8758</b> | <b>0.8460</b> | <b>0.8513</b> | <b>0.8473</b> | <b>0.8712</b> | <b>0.3625</b> | 0.0000        |               |               |               |               |       |
| RIOG | <b>0.8703</b> | <b>0.8442</b> | <b>0.8244</b> | <b>0.8306</b> | <b>0.8284</b> | <b>0.8451</b> | <b>0.6427</b> | <b>0.8475</b> | 0.0000        |               |               |               |       |
| INTE | <b>0.7765</b> | <b>0.7349</b> | <b>0.7189</b> | <b>0.7270</b> | <b>0.7264</b> | <b>0.7458</b> | <b>0.3622</b> | <b>0.5283</b> | <b>0.7930</b> | 0.0000        |               |               |       |
| SAMA | <b>0.8790</b> | <b>0.8429</b> | <b>0.8133</b> | <b>0.8221</b> | <b>0.8177</b> | <b>0.8400</b> | <b>0.3989</b> | <b>0.6719</b> | <b>0.8301</b> | <b>0.1276</b> | 0.0000        |               |       |
| WEST | <b>0.9376</b> | <b>0.9163</b> | <b>0.8815</b> | <b>0.8833</b> | <b>0.8769</b> | <b>0.8977</b> | <b>0.4999</b> | <b>0.7271</b> | <b>0.8702</b> | 0.0405        | <b>0.2810</b> | 0.0000        |       |
| ARGE | <b>0.9494</b> | <b>0.9297</b> | <b>0.9128</b> | <b>0.9195</b> | <b>0.9179</b> | <b>0.9296</b> | <b>0.7090</b> | <b>0.9103</b> | <b>0.8805</b> | <b>0.8585</b> | <b>0.8872</b> | <b>0.9289</b> | 0.000 |
